# Supplementary material for: A luminescent coordination polymer constructed from a fluorene-based bifunctional ligand for the selective detection of tetracyclines and 2,4,6-trinitrophenol
Source: Royal Society of Chemistry journal article supplement (doi:10.1039/d5ce00044k), 2025-01-01
Supplement: d5ce00044k1.pdf [file d5ce00044k1.pdf]

**A luminescent coordination polymer constructed from fluorene-based bifunctional ligands for the selective detection of tetracyclines and 2,4,6-trinitrophenol**

Guiling Wu,<sup>a</sup> Chuanzong Dong,<sup>b</sup> Pinzhen Liu<sup>a</sup> and Chunyang Zheng<sup>\*b</sup>

<sup>a</sup> *College of Chemistry and Chemical Engineering, Qiannan Normal University for Nationalities, Duyun 558000, PR China*

<sup>b</sup> *Hubei Key Laboratory of Pollutant Analysis and Reuse Technology, College of Chemistry and Chemical Engineering, Hubei Normal University, Huangshi 435002, P. R. China.*

\* E-mail: [cyzheng@hbnu.edu.cn](mailto:cyzheng@hbnu.edu.cn)

## CONTENTS

|                                                                                                                          |     |
|--------------------------------------------------------------------------------------------------------------------------|-----|
| <b>Materials, physical measurement</b> .....                                                                             | S3  |
| <b>Fluorescence measurements</b> .....                                                                                   | S3  |
| <b>Table S1.</b> SHAPE analysis of the Cd <sup>II</sup> and Pb <sup>II</sup> ions in <b>CP-Cd</b> and <b>CP-Pb</b> ..... | S4  |
| <b>Table S2</b> Structure of 9 antibiotics.....                                                                          | S5  |
| <b>Table S3</b> Structure of 8 phenols.....                                                                              | S6  |
| <b>Table S4</b> Comparison of <b>CP-Cd</b> with recent CPs luminescent sensors for TN and CTC.....                       | S7  |
| <b>Table S5</b> Comparison of <b>CP-Cd</b> with recent CPs luminescent sensors for TNP.....                              | S8  |
| <b>Fig. S1</b> <sup>1</sup> H NMR of <b>1</b> in CDCl <sub>3</sub> .....                                                 | S9  |
| <b>Fig. S2</b> <sup>1</sup> H NMR of <b>2</b> in CDCl <sub>3</sub> .....                                                 | S9  |
| <b>Fig. S3</b> <sup>13</sup> C NMR of <b>2</b> in CDCl <sub>3</sub> .....                                                | S9  |
| <b>Fig. S4</b> <sup>1</sup> H NMR of <b>3</b> in CDCl <sub>3</sub> .....                                                 | S10 |
| <b>Fig. S5</b> <sup>1</sup> H NMR of <b>3</b> in CDCl <sub>3</sub> .....                                                 | S10 |
| <b>Fig. S6</b> <sup>1</sup> H NMR of <b>3</b> in DMSO-d <sub>6</sub> .....                                               | S10 |
| <b>Fig. S7</b> <sup>1</sup> H NMR spectra of <b>H<sub>2</sub>L</b> in DMSO-d <sub>6</sub> .....                          | S11 |
| <b>Fig. S8</b> <sup>13</sup> C NMR spectra of <b>H<sub>2</sub>L</b> in DMSO-d <sub>6</sub> .....                         | S11 |
| <b>Fig. S9</b> Molecular structure of <b>3</b> .....                                                                     | S12 |
| <b>Fig. S10</b> Coordination environment of Pb <sup>2+</sup> in <b>CP-Pb</b> and 2D network of <b>CP-Pb</b> .....        | S12 |
| <b>Fig. S11</b> 2D Fingerprint plot of <b>H<sub>2</sub>L</b> .....                                                       | S12 |
| <b>Fig. S12</b> 2D Fingerprint plot of <b>CP-Cd</b> .....                                                                | S12 |
| <b>Fig. S13</b> The fluorescence quenching efficiency in 8 different phenols.....                                        | S13 |
| <b>Fig. S14</b> IR spectra of <b>CP-Cd</b> after sensing different analyte.....                                          | S13 |
| <b>Fig. S15</b> PXRD patterns of <b>CP-Cd</b> after the detection of analytes.....                                       | S13 |
| <b>Fig. S16</b> Overlap between the UV of phenols and the EX or EM spectrum of <b>CP-Cd</b> ... ..                       | S14 |
| <b>Fig. S17</b> The TG curve for <b>CP-Cd</b> under N <sub>2</sub> atmosphere.....                                       | S14 |

### Materials, physical measurement

all solvents and materials are purchased from Energy Chemical Reagent Co., Ltd. and can be used without any purification. The Single-crystal diffraction data **3**, **H<sub>2</sub>L** and **CP-Cd** were collected on a Rigaku Corporation XtaLAB Synergy-I with Cu-K $\alpha$  radiation ( $\lambda=1.54184$  Å) and Bruker APEX-II CCD with Mo-K $\alpha$  radiation ( $\lambda=0.71073$  Å) for **CP-Pb**. Powder X-ray diffraction (PXRD) measurements were carried out on Bruker D2 Phaser diffractometer with Cu-K $\alpha$  radiation ( $\lambda=1.54186$  Å). Thermo gravimetric analysis (TGA) was carried out with a NETZSCH STA 449F5 (TG/DTA) thermal analyzer in temperature region of 25–800 °C with heating rate of 10 °C·min<sup>-1</sup> under nitrogen flow. IR spectra of the two compounds were performed on a Bruker AXS TENSOR-27 FT-IR spectrometer (FTIR) with pressed KBr pellets in the range of 4000–400 cm<sup>-1</sup>. Fluorescence measurements were carried out on an F4700 (Hitachi) fluorescence spectrophotometer at room temperature. UV-vis absorption analysis was performed on a U-3010 spectrophotometer at room temperature. The <sup>1</sup>H and <sup>13</sup>C NMR spectra were recorded on Bruker AV 300 MHz.

### Fluorescence measurements

Well-ground powder of **CP-Cd** (2 mg) was suspended in deionized H<sub>2</sub>O (2 mL) using ultrasound for 30 min. For each sensing experiment, a 0.2 mM aqueous solution of antibiotics or phenols solutions were prepared and titrated into the suspension of **CP-Cd** at ambient temperature. Then, the fluorescence emission intensities of different metal ions in the mixed solvent system were measured. The anti-jamming capability of **CP-Cd** was verified by competitive experiments by adding various other analytes (0.2 mM) into **CP-Cd** (2 mg) with a TNP or two tetracyclines (0.2 mM) suspension in 2 mL H<sub>2</sub>O after sonication.

**Table S1.** SHAPE analysis of the Cd<sup>II</sup> and Pb<sup>II</sup> ions in **CP-Cd and CP-Pb**

| name         | label  | shape                         | symmetry | distortion( $\tau$ ) |
|--------------|--------|-------------------------------|----------|----------------------|
| <b>CP-Cd</b> | HP-6   | Hexagon                       | $D_{6h}$ | 33.327               |
|              | PPY-6  | Pentagonal pyramid            | $C_{5v}$ | 13.399               |
|              | OC-6   | Octahedron                    | $O_h$    | 10.307               |
|              | TPR-6  | Trigonal prism                | $D_{3h}$ | <b>7.791</b>         |
|              | JPPY-6 | Johnson pentagonal pyramid J2 | $C_{5v}$ | 17.817               |
| <b>CP-Pb</b> | HP-6   | Hexagon                       | $D_{6h}$ | 22.437               |
|              | PPY-6  | Pentagonal pyramid            | $C_{5v}$ | 18.514               |
|              | OC-6   | Octahedron                    | $O_h$    | 18.211               |
|              | TPR-6  | Trigonal prism                | $D_{3h}$ | <b>15.990</b>        |
|              | JPPY-6 | Johnson pentagonal pyramid J2 | $C_{5v}$ | 18.612               |

**Table S2** Structure of 9 antibiotics

| <b>Name</b>                     | <b>Structure</b>                                                                   | <b>Name</b>                  | <b>Structure</b>                                                                    |
|---------------------------------|------------------------------------------------------------------------------------|------------------------------|-------------------------------------------------------------------------------------|
| Sulfadiazine<br><b>SDZ</b>      | 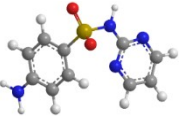  | Dimetridazole<br><b>DTZ</b>  |  |
| Ciprofloxacin<br><b>CPF</b>     |   | Ornidazole<br><b>ODZ</b>     |  |
| Chloramphenicol<br><b>CAP</b>   |   | Sulfamethazine<br><b>SMZ</b> |  |
| Metronidazole<br><b>MDZ</b>     |   | Tetracycline<br><b>TC</b>    |  |
| Chlortetracycline<br><b>CTC</b> |  |                              |                                                                                     |

**Table S2** Structure of 8 phenols

| Name                               | Structure                                                                         | Name                               | Structure                                                                           |
|------------------------------------|-----------------------------------------------------------------------------------|------------------------------------|-------------------------------------------------------------------------------------|
| phenol<br><b>PO</b>                | 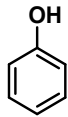 | m-dihydroxybenzene<br><b>m-DHB</b> |  |
| p-dihydroxybenzene<br><b>p-DHB</b> |  | 2-nitrophenol<br><b>2-NP</b>       |  |
| 3-nitrophenol<br><b>3-NP</b>       |  | 4-nitrophenol<br><b>4-NP</b>       |  |
| 2,4,6-Trinitrophenol<br><b>TNP</b> |  | 2,4-dinitrophenol<br><b>DNP</b>    |  |

**Table S4** Comparison of CP-Cd with recent LCPs-based luminescent sensors for CTC and TC

| LCPs-based chemosensor                                      | Analyst | $K_{sv} / M^{-1}$                    | LOD                             | Medium                | Ref.             |
|-------------------------------------------------------------|---------|--------------------------------------|---------------------------------|-----------------------|------------------|
| $\{[Cd(BrBDC)_2(DABCO)_2(DMF)] \cdot 0.5DMF\}_n$            | TC      | $9.87 \times 10^3$                   | 2.7 $\mu M$                     | H <sub>2</sub> O      | S1               |
| $[Ni(bim)_2(H_2O)_4](1,5-nds) \cdot (H_2O)_{0.5}$           | TC      | $4.1 \times 10^4$                    | 0.82 ppm                        | H <sub>2</sub> O      | S2               |
| $\{[Zn(2,6-NBC)(H_2O)] \cdot 0.5(H_2O)\}_n$                 | TC      | $3.15 \times 10^4$                   | 70 nM                           | H <sub>2</sub> O      | S3               |
| $\{[Cd(HL)(tpytz)(H_2O)]\}_n$                               | TC      | $2.776 \times 10^5$                  | 0.18 $\mu M$                    | H <sub>2</sub> O      | S4               |
| $\{[Zn(L)_{0.5}(bpy)_{0.5}(H_2O)] \cdot H_2O \cdot DMF\}_n$ | TC      | $6.90 \times 10^4$                   | 0.552 $\mu M$                   | H <sub>2</sub> O      | S5               |
| $\{[Tb(\mu_6-Hcaa)(H_2O)]Cl\}_n$                            | TC      | $7.12 \times 10^4$                   | 0.25 $\mu M$                    | H <sub>2</sub> O      | S6               |
|                                                             | CTC     | $7.51 \times 10^4$                   | 0.24 $\mu M$                    | H <sub>2</sub> O      |                  |
| CP-Cd                                                       | TC      | <b><math>3.24 \times 10^4</math></b> | <b>0.103 <math>\mu M</math></b> | <b>H<sub>2</sub>O</b> | <b>this work</b> |
|                                                             | CTC     | <b><math>4.91 \times 10^4</math></b> | <b>0.098 <math>\mu M</math></b> | <b>H<sub>2</sub>O</b> |                  |

- S1. A1. S. Datta, P. Ghorai, M. K. Chattopadhyay, N. C. Jana, P. Banerjee, M. H. Mir, *Cryst. Growth Des.*, 2024, **24**, 8645-8654.
- S2. G. Wang, Y.-C. Wang, J. Lu, W.-F. Yan, J. Jin, Y.-P. Wang, J.-J. Zhang, H.-J. Zhang, H. Dong, X.-G. Liu, *Dyes Pigments*, **2024**, *221*, 111832.
- S3. C. Hong, Y.-L. Huang, L. Li, J.-Y. Zou, E.-L. Wang, L. Zhang, Y.-W. Liu, S.-Y. You, *J. Mol. Struct.*, 2024, **1299**, 137113.
- S4. T. Liu, M. Ji, J. Zheng, N. Liu, H. Hao, J. Dou, J. Jiang, Y. Li, S. Wang, *J. Mater. Chem. C* 2024, **12**, 17635-17646.
- S5. L. Wang, T. Liu, J. Cheng, H. Zou, J. Lu, H. Liu, Y. Li, J. Dou, S. Wang, *J. Mol. Struct.*, 2024 **1296**, 136815.
- S6. Y. Zhang, A. Wang, S. Feng, C. Yuan and L. Lu, *Dalton Trans.*, 2023, **52**, 5243-5251.

**Table S5** Comparison of **CP-Cd** with recent LCPs-based luminescent sensors for TNP

| LCPs-based chemosensor                                                                                                                      | $K_{sv} / M^{-1}$                    | LOD                            | Medium                | Ref.             |
|---------------------------------------------------------------------------------------------------------------------------------------------|--------------------------------------|--------------------------------|-----------------------|------------------|
| CdMOF-NH <sub>2</sub>                                                                                                                       | $2.1 \times 10^4$                    | 0.031 $\mu$ M                  | H <sub>2</sub> O      | S7               |
| ZnMOF-NH <sub>2</sub>                                                                                                                       | $2.23 \times 10^4$                   | 0.045 $\mu$ M                  |                       |                  |
| {[Eu <sub>6</sub> L <sub>6</sub> ( $\mu$ -OH) <sub>8</sub> (H <sub>2</sub> O) <sub>3</sub> ] <sub>8</sub> ·H <sub>2</sub> O} <sub>n</sub> } | $1.92 \times 10^4$                   | 1.93 $\mu$ M                   | DMF                   | S8               |
| [Zn <sub>2</sub> (tdc) <sub>4</sub> (pdic) <sub>3</sub> ]                                                                                   | $0.8 \times 10^5$                    | 0.154 $\mu$ M                  | H <sub>2</sub> O      | S9               |
| [Cd <sub>3</sub> (H <sub>2</sub> O)(H <sub>3</sub> L) <sub>2</sub> (dia) <sub>2</sub> ]·4DMA·10H <sub>2</sub> O                             | $1.43 \times 10^5$                   | NR                             | H <sub>2</sub> O      | S10              |
| [Zn-(PBBA)(H <sub>2</sub> O)]·3DMF·2H <sub>2</sub> O                                                                                        | $4.4 \times 10^4$                    | 1.0 $\mu$ M                    | H <sub>2</sub> O      | S11              |
| <b>CP-Cd</b>                                                                                                                                | <b><math>4.77 \times 10^4</math></b> | <b>0.147 <math>\mu</math>M</b> | <b>H<sub>2</sub>O</b> | <b>This work</b> |

- S7. M. Kaur, M. Yusuf, Y. F. Tsang, K. H. Kim, A. K. Malik, *Sci Total Environ.*, 2023, **857**, 159385.
- S8. Y. Zhao, C. A. Wang, J. K. Li, Q. L. Li, Q. Guo, J. Ru, C. L. Ma, Y. F. Han, *RSC Adv.*, 2022, **12**, 26945-26952.
- S9. G. Bairy, A. Dey, B. Dutta, S. Maity, C. Sinha, *Dalton Trans.*, 2022, **51**, 13749-13761
- S10. Q. An, S. Bao, X. Li, J. Sun and Z. Su, *New J. Chem.*, 2022, **46**, 11377-11381.
- S11. W. Liu, J. Qiao, J. Gu and Y. Liu, *Inorg. Chem.*, 2023, **62**, 1272-1278.



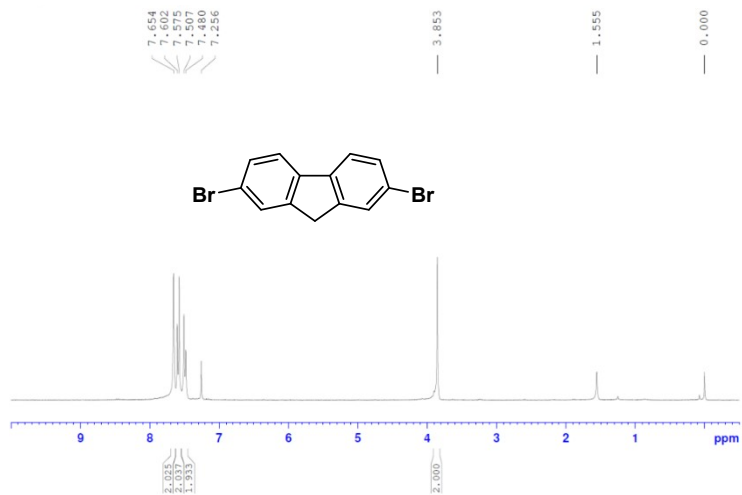

**Fig.S1** <sup>1</sup>H NMR spectra of **1** in CDCl<sub>3</sub>

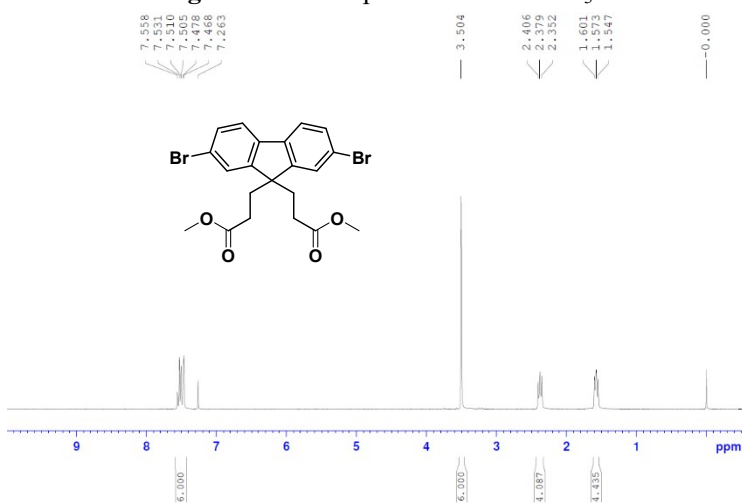

**Fig. S2** <sup>1</sup>H NMR spectra of **2** in CDCl<sub>3</sub>

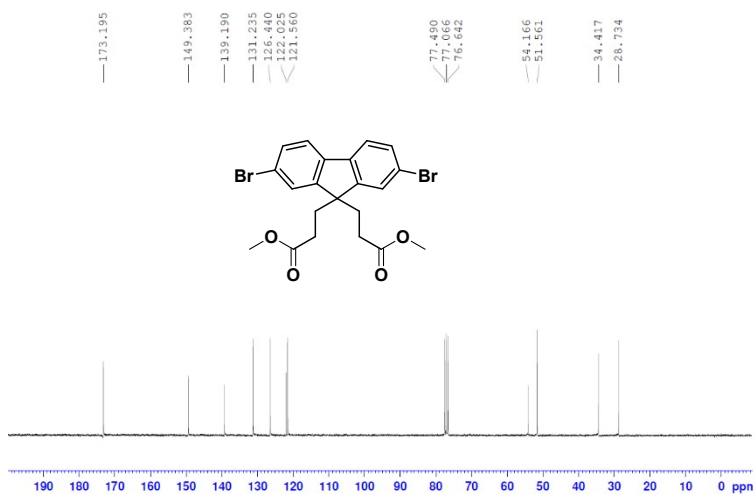

**Fig. S3** <sup>13</sup>C NMR spectra of **2** in CDCl<sub>3</sub>

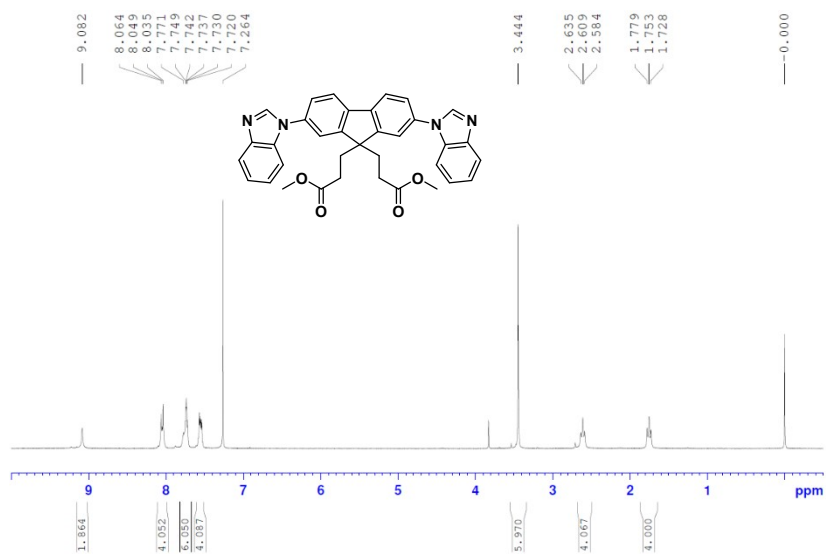

**Fig. S4** <sup>1</sup>H NMR spectra of **3** in CDCl<sub>3</sub>

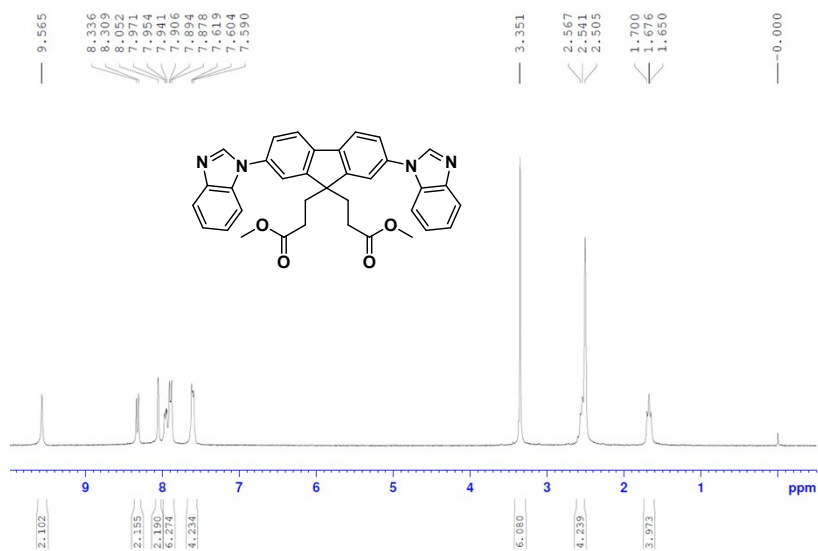

**Fig. S5** <sup>1</sup>H NMR spectra of **3** in DMSO-d<sub>6</sub>

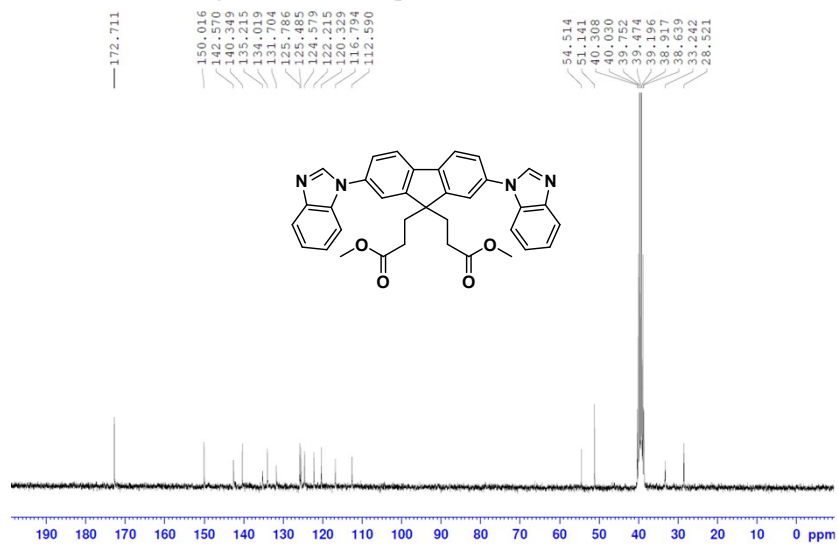

**Fig. S6** <sup>13</sup>C NMR spectra of **3** in DMSO-d<sub>6</sub>

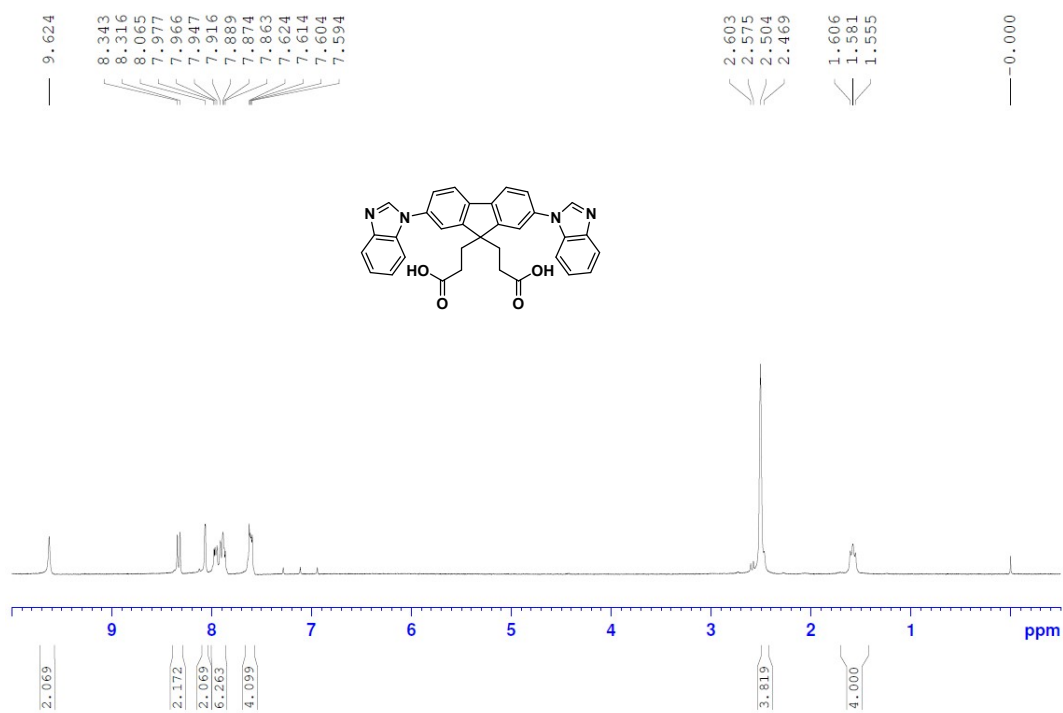

Fig. S7  $^1H$  NMR spectra of  $H_2L$  in  $DMSO-d_6$

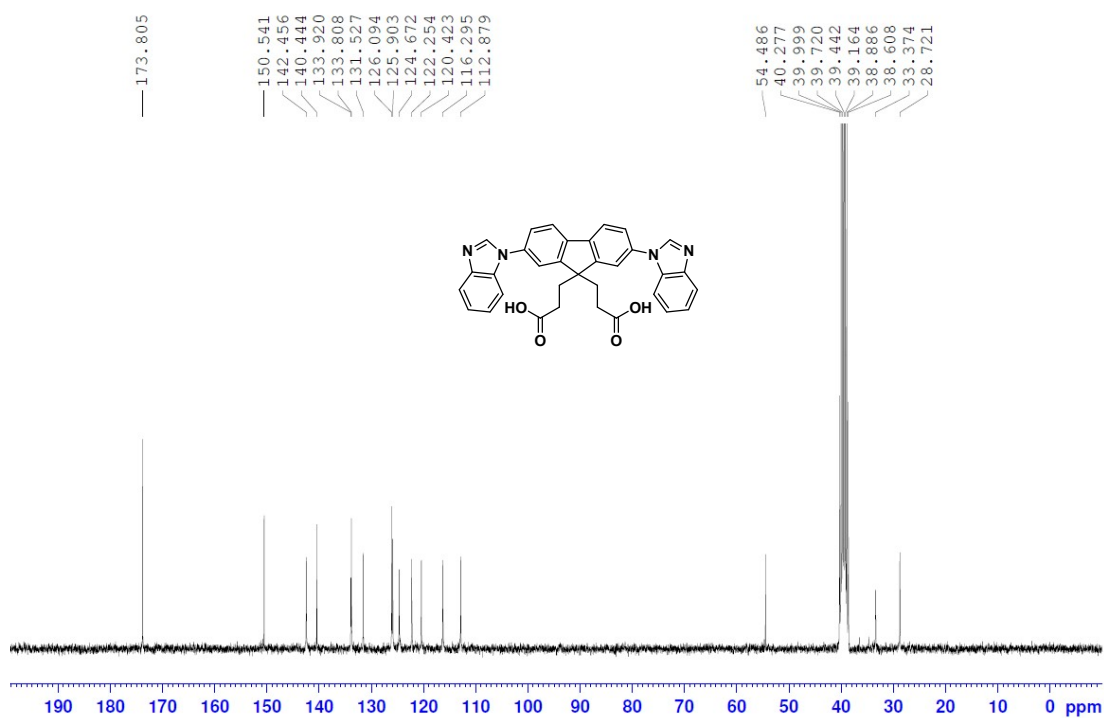

Fig. S8  $^{13}C$  NMR spectra of  $H_2L$  in  $DMSO-d_6$

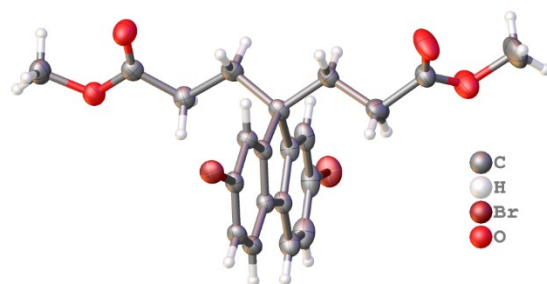

Fig. S9 Molecular structure of 3

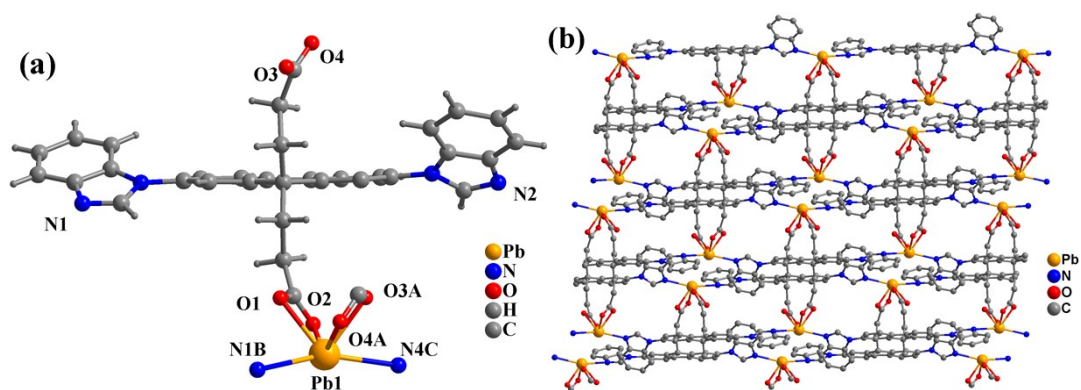

Fig. S10 (a) Coordination environment of  $\text{Pb}^{2+}$  in CP-Pb;  
(b) 2D network assembly diagram of CP-Pb

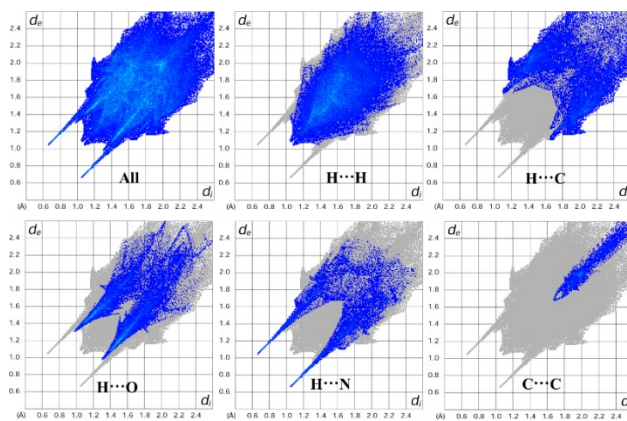

Fig. S11 2D Fingerprint plot of  $\text{H}_2\text{L}$

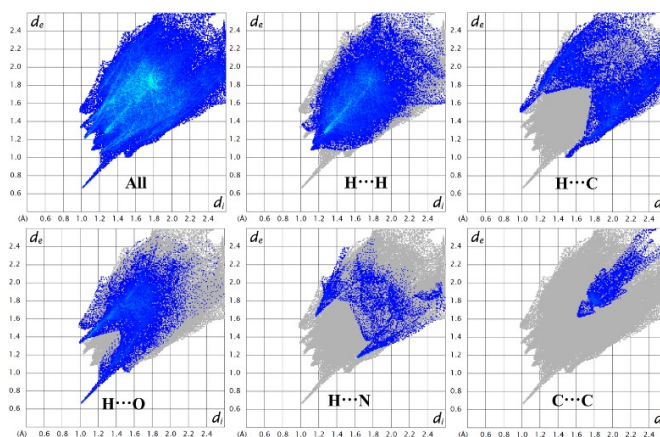

Fig. S12 2D Fingerprint plot of CP-Cd

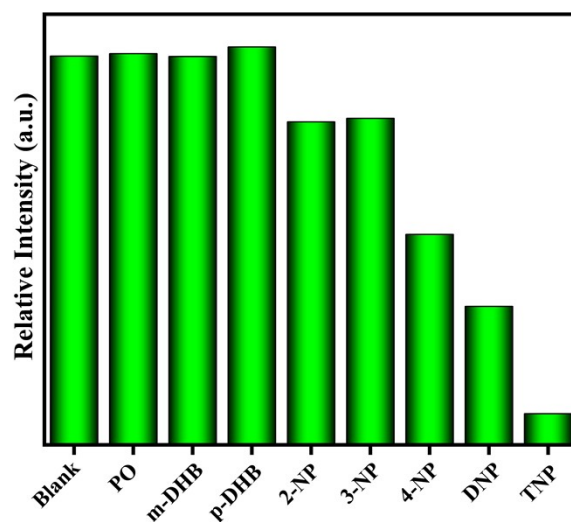

Fig. S13 The percentage of fluorescence quenching efficiency in 8 different phenols

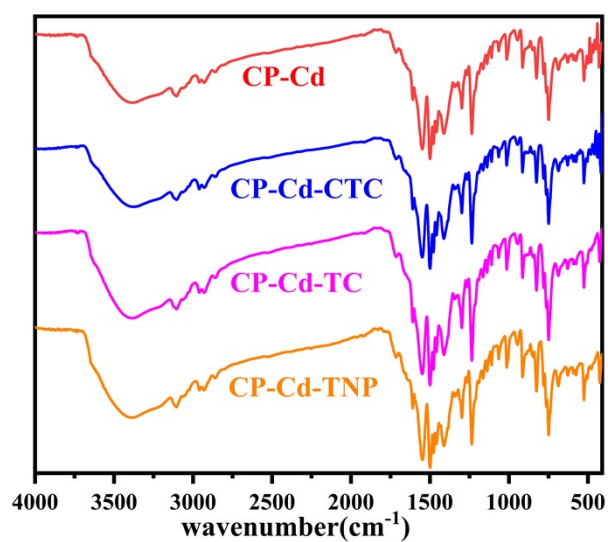

Fig. S14 IR spectra of CP-Cd after sensing different analytes

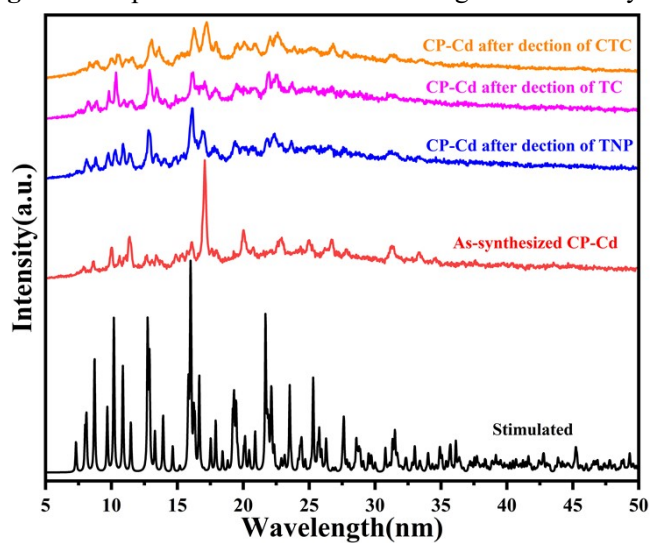

Fig. S15 PXRD patterns of CP-Cd after the detection of analytes

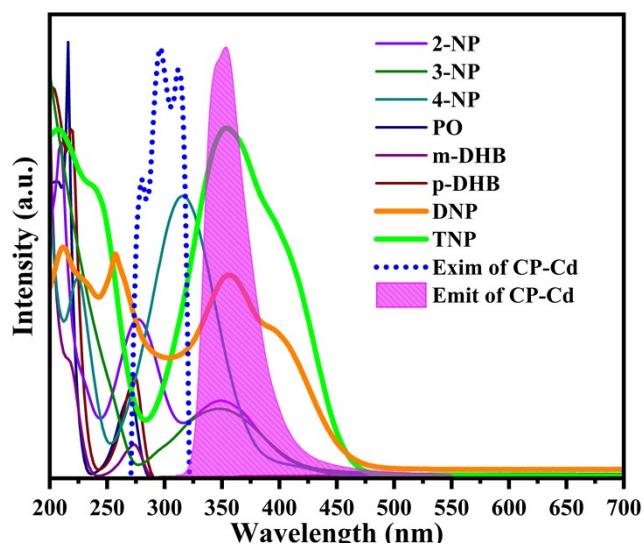

Fig. S16 Overlap between the UV absorption spectra of various phenols and the excitation or emission spectrum of CP-Cd

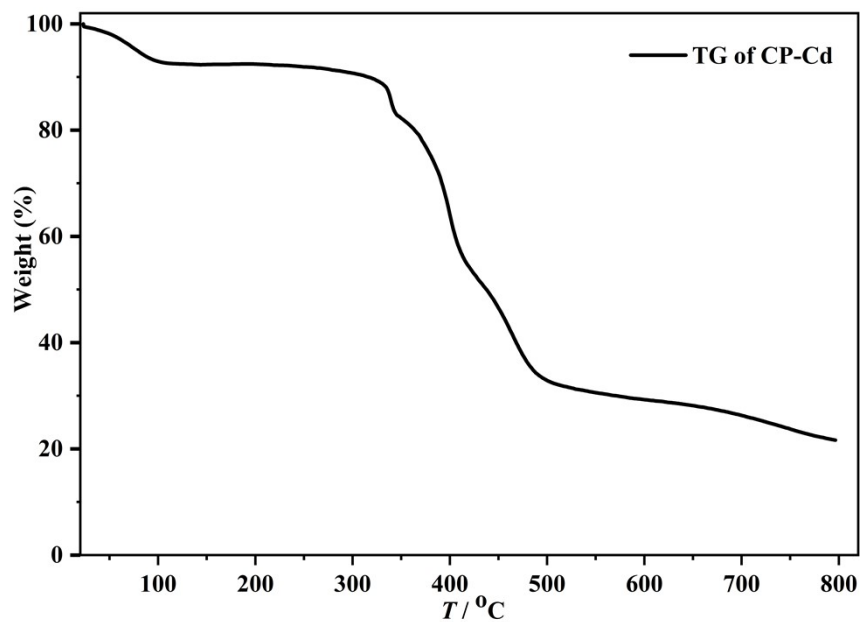

Fig. S17 The TG curve for CP-Cd under N<sub>2</sub> atmosphere
